# Supplementary material
Source: HighWire-hosted journal article supplement (https://cmaj.ca/highwire/filestream/77695/field_highwire_adjunct_files/0/200424-image-1-at.pdf)
Supplement: 200424-image-1-at.pdf [file 200424-image-1-at.pdf]

## Appendix 1 (as submitted by authors): Supplementary information

### Neuroimaging

CT cerebral venography of the head with contrast was normal. Vein of Galen and straight sinuses were patent.

MR angiogram head without contrast was normal.

MRI cervical spine showed minor degenerative changes in the cervical spine without significant central or foraminal narrowing at any level. There were no intramedullary signal changes.

CT chest, abdomen, and pelvis with contrast were negative for malignancy.

### Electrodiagnostic studies:

Electroencephalogram showed rare left frontotemporal low to moderate voltage 3-4 hz slow waves without epileptiform activity or electrographic seizures.

There was no evidence of spontaneous motor unit action potentials at rest on electromyography.

| <b>Laboratory tests:</b>    | <b>Results</b> | <b>Value</b> | <b>Reference range</b> |
|-----------------------------|----------------|--------------|------------------------|
| Lactate                     | Normal         | 0.5          | (< 2.1 mmol/L)         |
| Ammonia                     | Normal         | 39           | (18-50 mmol/L)         |
| Thyroglobulin antibody      | Normal         | < 1          | (<4 IU/ml)             |
| Thyroid peroxidase antibody | Normal         | 2            | (< 9 IU/ml)            |
| TSH                         | Low            | 0.24         | 0.45-5.33 IU/ml)       |
| <b>Peroxidase antibody:</b> |                |              |                        |
| C22:0                       | Normal         | 45.5         | <=96.3 nmol/mL         |
| C24:0                       | Normal         | 31.3         | <=91.4 nmol/mL         |
| C26:0                       | Normal         | 0.61         | <=1.30 nmol/mL         |
| C24:0 to C22:0 Ratio        | Normal         | 0.69         | <=1.39 ratio           |
| C26:0 to C22:0 Ratio        | Normal         | 0.013        | <=0.023 ratio          |
| Pristanic Acid              | Normal         | 0.06         | <=2.98 nmol/mL         |
| Phytanic Acid               | Normal         | 0.35         | <=9.88 nmol/mL         |
| Pristanic/Phytanic          | Normal         | 0.17         | <=0.39 ratio           |

| <b>Laboratory tests:</b>                    | <b>Results</b> | <b>Value</b> | <b>Reference range</b> |
|---------------------------------------------|----------------|--------------|------------------------|
| <b>Blood Toxicology:</b>                    |                |              |                        |
| Arsenic                                     | Normal         | < 2          | (< 23 mcg/L)           |
| Copper                                      | Normal         | 1026         | (810 - 1,990 ug/L)     |
| Lead                                        | Normal         | < 1          | (<5 ug/dL)             |
| Mercury                                     | Normal         | < 2          | (<11 mcg/L)            |
| <b>Cerebrospinal fluid:</b>                 |                |              |                        |
| CSF white blood cell count (WBC)            | Normal         | < 3/ cu mm   | (0 - 5 /cu mm)         |
| CSF glucose                                 | Normal         | 49 mg/dl     | (40 - 80 mg/dL)        |
| CSF VDRL                                    | Negative       |              |                        |
| CSF West Nile IgG and IgM antibodies        | Negative       |              |                        |
| CSF Lyme antibody                           | Negative       |              |                        |
| CSF Toxoplasma gondii DNA (PCR)             | Negative       |              |                        |
| CSF Cytomegalovirus (CMV) DNA, quantitative | Negative       |              |                        |
| Herpes simplex Virus (HSV) DNA, PCR CSF     | Negative       |              |                        |
| CSF EBV DNA, PCR                            | Negative       |              |                        |
| CSF Varicella Zoster, PCR                   | Negative       |              |                        |
| CSF bacterial culture with gram stain       | Negative       |              |                        |
| CSF fungal culture                          | Negative       |              |                        |
| TB QuantiFERON gold                         | Negative       |              |                        |
| CSF India Ink prep                          | Negative       |              |                        |
| CSF AFB cultures (3)                        | Negative       |              |                        |
| CSF IgG index                               | Normal         | 0.7          | (0.3 - 0.7 Ratio)      |
| CSF Oligoclonal bands                       | Negative       |              |                        |
